# Supplementary material for: Structure of ionic liquids with amino acid anions via neutron diffraction
Source: Royal Society of Chemistry journal article supplement (doi:10.1039/c5ra06785e), 2015-01-01
Supplement: c5ra06785e1.pdf [file c5ra06785e1.pdf]

## Structure of Amino Acid Ionic Liquids via Neutron Diffraction

S. E. Norman,<sup>1</sup> A. Turner,<sup>1</sup> and T. G. A. Youngs<sup>2</sup>

<sup>1</sup> School of Chemistry and Chemical Engineering, Queen's University Belfast, Belfast, BT9 5AG

<sup>2</sup> ISIS Facility, STFC Rutherford Appleton Laboratory, Harwell Oxford, Didcot, OX11 0QX

### Supplementary Information

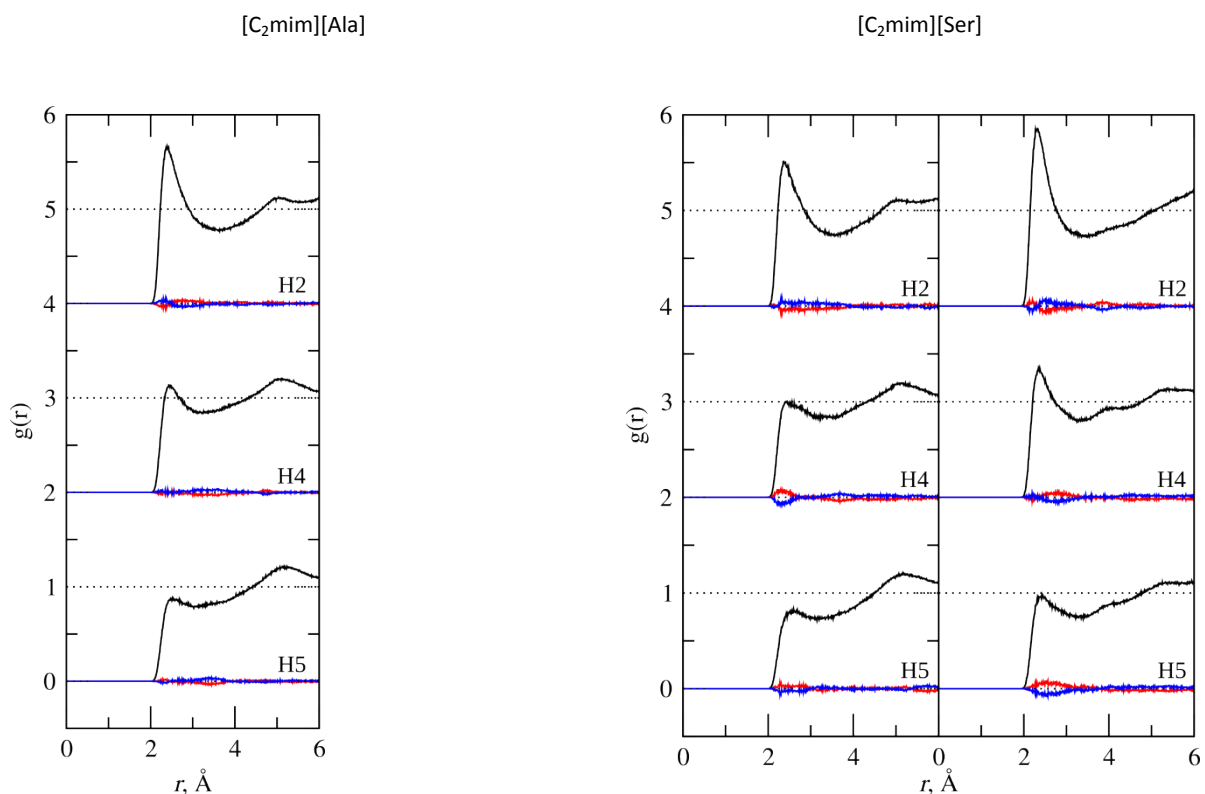

EMIM ring H to Ala N(H<sub>2</sub>) (black = original, red = R, blue = S)

EMIM ring H to Ser N(H<sub>2</sub>) (left) and O(H) (right) (black = original, red = R, blue = S)

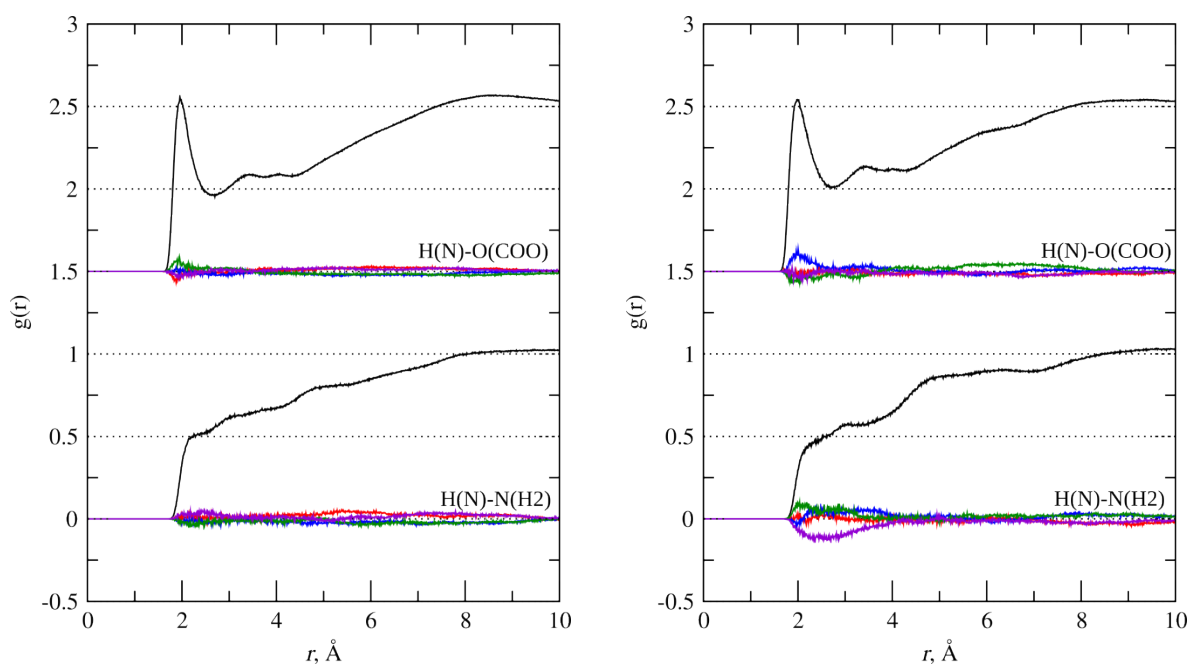

Differences in alaninate amine H to N(H<sub>2</sub>) and O(COO) partials (black = original, red = RR (22), blue = RS (23), green = SR (32), and violet = SS)

Differences in serinate amine H to N(H<sub>2</sub>) and O(COO) partials (black = original, red = RR (22), blue = RS (23), green = SR (32), and violet = SS)

(33))

(33))

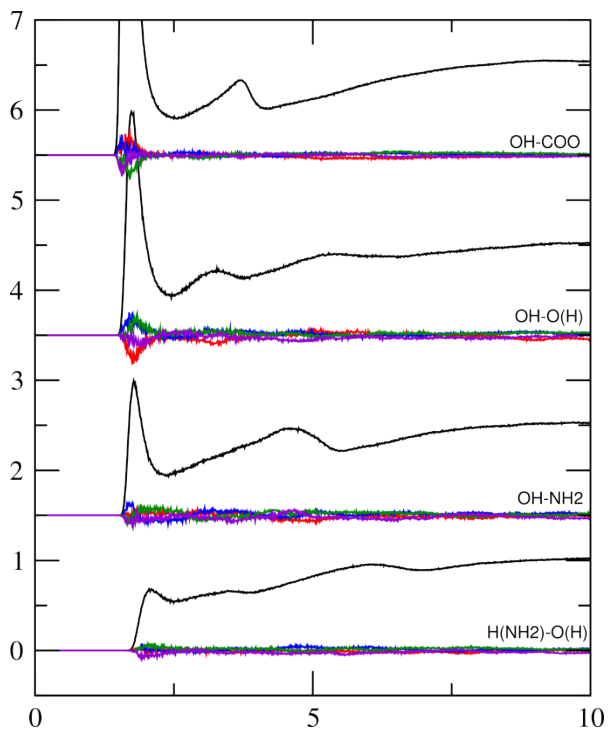

Differences in serinate partials involving OH group (black = original, red = RR (22), blue = RS (23), green = SR (32), and violet = SS (33))

# Molecular detail files for EPSR

## 1-ethyl-3-methylimidazolium cation

```

.gmol      0
atom      1 H1b -0.305960000    0.449243009    2.35813594    1    2
atom      2 C1  0.451999992   -9.32310000E-02    1.92300606    4    3    1    15    19
atom      3 NA  0.123534001   -0.178635001    0.470872998    3    2    4    7
atom      4 CR -0.966162026    0.241712004   -9.68020037E-02    3    3    5    14
atom      5 NA -0.938925028   -1.55579997E-02   -1.42091703    3    4    10    6
atom      6 CW  0.191183001   -0.724345982   -1.65256000    3    5    9    7
atom      7 CW  0.867322981   -0.855059981   -0.489558011    3    3    6    8
atom      8 HCW  1.78231502   -1.42358100   -0.285596997    1    7
atom      9 HCW  0.414918989   -1.10908496   -2.61120892    1    6
atom     10 C1 -1.89739096    0.304291010   -2.50104189    4    5    11    12    13
atom     11 H1a -1.49060202    0.863346994   -3.37342596    1    10
atom     12 H1a -2.23552990   -0.637015998   -2.93240094    1    10
atom     13 H1a -2.77735591    0.945151985   -2.17863202    1    10
atom     14 HCR -1.71167505    0.780197978    0.371327996    1    4
atom     15 CE  1.82881105    0.515506029    2.39065289    4    2    16    17    18
atom     16 HC  1.71436703    1.57997704    2.26757193    1    15
atom     17 HC  2.70873690    0.137338996    1.93804801    1    15
atom     18 HC  1.88502800    0.282270998    3.45725608    1    15
atom     19 H1b 0.355385005   -1.06252301    2.36527205    1    2
bond HC   HC    1.83000
bond H1a  H1a   1.83000
bond H1b  H1b   1.83000
bond NA   C1    1.46600
bond NA   CR    1.31500
bond NA   CW    1.37800
bond CR   HCR   1.08000
bond CW   HCW   1.08000
bond CW   CW    1.34100
bond C1   H1    1.09000
bond C1   CE    1.52900
bond CE   HC    1.09000
bond HCR  HCW   4.12000
bond HCW  HCW   2.72000
bond C1   C1    5.02000
bond H1b  C1    1.09000
bond C1   H1a   1.09000
angle NA   C1   H1    110.70000
angle NA   C1   CE    112.70000
angle H1   C1   CE    110.70000
angle H1   C1   H1    107.80000
angle C1   NA   CR    126.40000
angle C1   NA   CW    125.60000
angle CR   NA   CW    108.00000
angle NA   CR   NA    109.80000
angle NA   CR   HCR   125.10000
angle NA   CW   HCW   122.00000
angle NA   CW   CW    107.10000
angle HCW  CW   CW    130.89999
angle C1   CE   HC    110.70000
angle HC   CE   HC    107.80000
angle NA   C1   H1b   110.70000
angle H1b  C1   CE    110.70000
angle H1b  C1   H1b   107.80000
angle NA   C1   H1a   110.70000
angle H1a  C1   H1a   107.80000
rot      3    2
rot      5   10
rot      2   15
changelabel H1a H1
changelabel H1b H1
potential H1  0.12552E+00  0.25000E+01  0.10080E+01  0.13000E+00 H
potential C1 0.27614E+00  0.35000E+01  0.12011E+02 -0.17000E+00 C
potential NA 0.71128E+00  0.32500E+01  0.14007E+02  0.15000E+00 N
potential CR 0.29288E+00  0.35500E+01  0.12011E+02 -0.11000E+00 C
potential CW 0.29288E+00  0.35500E+01  0.12011E+02 -0.13000E+00 C
potential HCW 0.12552E+00  0.24200E+01  0.10080E+01  0.21000E+00 H
potential HCR 0.12552E+00  0.24200E+01  0.10080E+01  0.21000E+00 H
potential CE 0.27614E+00  0.35000E+01  0.12011E+02 -0.50000E-01 C
potential HC 0.12552E+00  0.25000E+01  0.10080E+01  0.60000E-01 H
temperature 0.300000E+03
vibtemp 0.650000E+02
angtemp 0.200000E+01
dihtemp 0.000000E+00
ecoredcore 1.00000 1.00000
density 0.100000E+00

```

## Glycinate anion

```
.gmol      0
atom       1  C1A  -0.283919990  -0.482041001  -5.67639992E-02  4  2  3  4  9
atom       2  NH2  -0.674108028  -0.989943981  -1.36861205  3  1  7  8
atom       3  COA  1.01859999  -1.06746697  0.544483006  3  1  5  6
atom       4  H1A  -1.08283305  -0.691254973  0.651966989  1  1
atom       5  OA   1.47298503  -2.07615805  -1.19519997E-02  1  3
atom       6  OA   1.44237900  -0.468358010  1.53997505  1  3
atom       7  HN   -3.37460004E-02  -0.628225982  -2.04932499  1  2
atom       8  HN   -0.486234993  -1.97507000  -1.36065698  1  2
atom       9  H1A  -0.193293005  0.598730028  -9.99090001E-02  1  1
bond C1A NH2  1.45985
bond C1A COA  1.54945
bond C1A H1A  1.08827
bond NH2 HN   1.00213
bond COA OA   1.23836
angle NH2 C1A COA  116.22729
angle NH2 C1A H1A  108.79141
angle COA C1A H1A  106.96436
angle H1A C1A H1A  106.17678
angle C1A NH2 HN   108.30218
angle HN NH2 HN   103.90028
angle C1A COA OA   116.22171
angle OA COA OA   129.08961
rot 1 2
rot 1 3
potential C1A  0.66000E-01  0.35000E+01  0.12011E+02  0.33800E+00  C
potential NH2  0.17000E+00  0.33000E+01  0.14007E+02  -0.11190E+01  N
potential COA  0.10500E+00  0.37500E+01  0.12011E+02  0.95300E+00  C
potential H1A  0.30000E-01  0.25000E+01  0.10080E+01  -0.39500E-01  H
potential OA   0.21000E+00  0.29600E+01  0.15999E+02  -0.92150E+00  O
potential HN   0.15000E-01  0.20000E+01  0.10080E+01  0.37500E+00  H
temperature  0.300000E+03
vibtemp     0.650000E+02
angtemp     0.200000E+01
dihtemp     0.000000E+00
ecoredcore  1.00000  1.00000
density     0.100000E+00
```

## Alaninate anion (R)

```
.gmol      0
atom       1  C1A  -0.339547008  -0.488074005  -8.59439969E-02  4  2  3  4  5
atom       2  C2A  -0.336870015  1.03524196  -0.177248001  4  1  6  7  12
atom       3  NH2  -0.664905012  -1.06275904  -1.39094806  3  1  10  11
atom       4  COA  0.974878013  -1.03341305  0.550190985  3  1  8  9
atom       5  H1A  -1.13522995  -0.776373029  0.600166023  1  1
atom       6  H2A  0.445879012  1.37729394  -0.854586005  1  2
atom       7  H2A  -1.29024899  1.39827204  -0.556630015  1  2
atom       8  OA   1.52009702  -1.97398806  -4.19650003E-02  1  4
atom       9  OA   1.31215501  -0.483065009  1.60529602  1  4
atom      10  HN   -3.42019983E-02  -0.676191986  -2.06878304  1  3
atom      11  HN   -0.406165987  -2.03033495  -1.35106599  1  3
atom      12  H2A  -0.142542005  1.46719205  0.795212984  1  2
bond C1A C2A  1.52605
bond C1A NH2  1.46259
bond C1A COA  1.55877
bond C1A H1A  1.08948
bond C2A H2A  1.09018
bond NH2 HN   1.00333
bond COA OA   1.23798
bond OA OA   2.23100
angle C2A C1A NH2  109.82971
angle C2A C1A COA  111.84901
angle C2A C1A H1A  107.64417
angle NH2 C1A COA  114.47198
angle NH2 C1A H1A  107.18539
angle COA C1A H1A  105.44217
angle C1A C2A H2A  110.58695
angle H2A C2A H2A  107.92091
angle C1A NH2 HN   108.15392
angle HN NH2 HN   103.68172
angle C1A COA OA   115.62500
angle OA COA OA   128.75000
rot 1 2
rot 1 3
rot 1 4
potential C1A  0.66000E-01  0.35000E+01  0.12011E+02  0.63600E+00  C
potential C2A  0.66000E-01  0.35000E+01  0.12011E+02  -0.42400E+00  C
potential NH2  0.17000E+00  0.33000E+01  0.14007E+02  -0.11930E+01  N
potential COA  0.10500E+00  0.37500E+01  0.12011E+02  0.80900E+00  C
potential H1A  0.30000E-01  0.25000E+01  0.10080E+01  -0.70000E-01  H
potential H2A  0.30000E-01  0.25000E+01  0.10080E+01  0.77000E-01  H
potential OA   0.21000E+00  0.29600E+01  0.15999E+02  -0.87650E+00  O
potential HN   0.15000E-01  0.20000E+01  0.10080E+01  0.38200E+00  H
temperature  0.300000E+03
vibtemp     0.650000E+02
angtemp     0.200000E+01
dihtemp     0.000000E+00
ecoredcore  1.00000  1.00000
density     0.100000E+00
```

## Alaninate anion (S)

```
.gmol 0
atom 1 C1A -6.66190013E-02 -0.387836993 -0.655815005 4 2 3 4 5
atom 2 C2A -0.394439995 1.01846397 -0.162169993 4 1 6 7 12
atom 3 NH2 -1.14435005 -1.30613804 -0.289238006 3 1 10 11
atom 4 COA 1.35323203 -0.845167994 -0.203437001 3 1 8 9
atom 5 H1A -2.78140008E-02 -0.355120003 -1.74411595 1 1
atom 6 H2A -0.444429994 1.04059398 0.926634014 1 2
atom 7 H2A -1.35805798 1.34546196 -0.548390985 1 2
atom 8 OA 1.43223202 -1.97864103 0.288080990 1 4
atom 9 OA 2.25816107 -3.01089995E-02 -0.419467002 1 4
atom 10 HN -1.30135298 -1.22549796 0.698450029 1 3
atom 11 HN -0.779958010 -2.23375297 -0.396423012 1 3
atom 12 H2A 0.376693010 1.71154702 -0.470411986 1 2
bond C1A C2A 1.52605
bond C1A NH2 1.46259
bond C1A COA 1.55877
bond C1A H1A 1.08948
bond C2A H2A 1.09018
bond NH2 HN 1.00333
bond COA OA 1.23798
bond OA OA 2.23100
angle C2A C1A NH2 109.82971
angle C2A C1A COA 111.84901
angle C2A C1A H1A 107.64417
angle NH2 C1A COA 114.47198
angle NH2 C1A H1A 107.18539
angle COA C1A H1A 105.44217
angle C1A C2A H2A 110.58695
angle H2A C2A H2A 107.92091
angle C1A NH2 HN 108.15392
angle HN NH2 HN 103.68172
angle C1A COA OA 115.62500
angle OA COA OA 128.75000
rot 1 2
rot 1 3
rot 1 4
potential C1A 0.66000E-01 0.35000E+01 0.12011E+02 0.63600E+00 C
potential C2A 0.66000E-01 0.35000E+01 0.12011E+02 -0.42400E+00 C
potential NH2 0.17000E+00 0.33000E+01 0.14007E+02 -0.11930E+01 N
potential COA 0.10500E+00 0.37500E+01 0.12011E+02 0.80900E+00 C
potential H1A 0.30000E-01 0.25000E+01 0.10080E+01 -0.70000E-01 H
potential H2A 0.30000E-01 0.25000E+01 0.10080E+01 0.77000E-01 H
potential OA 0.21000E+00 0.29600E+01 0.15999E+02 -0.87650E+00 O
potential HN 0.15000E-01 0.20000E+01 0.10080E+01 0.38200E+00 H
temperature 0.300000E+03
vibtemp 0.650000E+02
angtemp 0.200000E+01
dihtemp 0.000000E+00
ecoredcore 1.00000 1.00000
density 0.100000E+00
```

## Serinate anion (R)

```
.gmol 0
atom 1 C1A -0.382730991 -0.552901030 -0.141111001 4 2 3 4 5
atom 2 C2A -0.454566985 0.974842012 -0.161896005 4 1 6 7 8
atom 3 NH2 -0.579509020 -1.05763495 -1.49681902 3 1 11 12
atom 4 COA 0.904227018 -1.08857095 0.550917983 3 1 9 10
atom 5 H1A -1.21638501 -0.903473973 0.466179013 1 1
atom 6 OH -0.456671000 1.54265404 1.11350703 2 2 13
atom 7 H2A 0.383946002 1.36299503 -0.748341978 1 2
atom 8 H2A -1.36864698 1.27851903 -0.662526011 1 2
atom 9 OA 1.39062202 -2.11846495 8.34690034E-02 1 4
atom 10 OA 1.29195094 -0.432900995 1.53711700 1 4
atom 11 HN 0.107897997 -0.639487028 -2.09681892 1 3
atom 12 HN -0.331212997 -2.02839708 -1.48083305 1 3
atom 13 HO 0.215193003 1.06305301 1.59899902 1 6
bond C1A C2A 1.52957
bond C1A NH2 1.45994
bond C1A COA 1.55631
bond C1A H1A 1.08935
bond C2A OH 1.39609
bond C2A H2A 1.09439
bond NH2 HN 1.00368
bond COA OA 1.23117
bond OH HO 0.95766
angle C2A C1A NH2 109.04798
angle C2A C1A COA 112.87109
angle C2A C1A H1A 107.04173
angle NH2 C1A COA 113.91470
angle NH2 C1A H1A 107.65420
angle COA C1A H1A 105.91276
angle C1A C2A OH 113.19651
angle C1A C2A H2A 108.99889
angle OH C2A H2A 110.27004
angle H2A C2A H2A 107.38698
angle C1A NH2 HN 108.58881
angle HN NH2 HN 104.08822
angle C1A COA OA 116.47375
angle OA COA OA 128.14915
angle C2A OH HO 104.97440
rot 1 2
rot 1 3
rot 1 4
```

```

rot 2 6
potential C1A 0.66000E-01 0.35000E+01 0.12011E+02 0.31100E+00 C
potential C2A 0.66000E-01 0.35000E+01 0.12011E+02 0.30700E+00 C
potential NH2 0.17000E+00 0.33000E+01 0.14007E+02 -0.12080E+01 N
potential COA 0.10500E+00 0.37500E+01 0.12011E+02 0.83400E+00 C
potential H1A 0.30000E-01 0.25000E+01 0.10080E+01 0.11000E-01 H
potential OH 0.17000E+00 0.31200E+01 0.15999E+02 -0.83800E+00 O
potential H2A 0.30000E-01 0.25000E+01 0.10080E+01 0.25000E-02 H
potential OA 0.21000E+00 0.29600E+01 0.15999E+02 -0.85400E+00 O
potential HN 0.15000E-01 0.20000E+01 0.10080E+01 0.40600E+00 H
potential HO 0.15000E-01 0.15000E+01 0.10080E+01 0.47400E+00 H
temperature 0.30000E+03
vibtemp 0.65000E+02
angtemp 0.20000E+01
dihtemp 0.00000E+00
ecoredcore 1.00000 1.00000
density 0.10000E+00

```

## Serinate anion (L)

```

.gmol 0
atom 1 C1A -0.181435004 -0.480704993 -0.491263002 4 2 3 4 5
atom 2 C2A -0.597853005 0.910414994 -1.06680002E-02 4 1 6 7 8
atom 3 NH2 -1.22885501 -1.43736696 -0.146107003 3 1 11 12
atom 4 COA 1.23613095 -0.891927004 2.20600003E-03 3 1 9 10
atom 5 H1A -0.118519001 -0.437483013 -1.57793403 1 1
atom 6 OH 0.255755007 1.92308795 -0.452163011 2 2 13
atom 7 H2A -0.650578022 0.908726990 1.08244801 1 2
atom 8 H2A -1.59375203 1.12916195 -0.383127987 1 2
atom 9 OA 1.40116000 -2.08300900 0.266510010 1 4
atom 10 OA 2.07410097 2.93649994E-02 4.51989993E-02 1 4
atom 11 HN -1.38786697 -1.39432597 0.843962014 1 3
atom 12 HN -0.843066990 -2.35073900 -0.291729987 1 3
atom 13 HO 1.13889205 1.57503295 -0.325489014 1 6
bond C1A C2A 1.52957
bond C1A NH2 1.45994
bond C1A COA 1.55631
bond C1A H1A 1.08935
bond C2A OH 1.39609
bond C2A H2A 1.09439
bond NH2 HN 1.00368
bond COA OA 1.23117
bond OH HO 0.95766
angle C2A C1A NH2 109.04798
angle C2A C1A COA 112.87109
angle C2A C1A H1A 107.04173
angle NH2 C1A COA 113.91470
angle NH2 C1A H1A 107.65420
angle COA C1A H1A 105.91276
angle C1A C2A OH 113.19651
angle C1A C2A H2A 108.99889
angle OH C2A H2A 110.27004
angle H2A C2A H2A 107.38698
angle C1A NH2 HN 108.58881
angle HN NH2 HN 104.08822
angle C1A COA OA 116.47375
angle OA COA OA 128.14915
angle C2A OH HO 104.97440
rot 1 2
rot 1 3
rot 1 4
rot 2 6
potential C1A 0.66000E-01 0.35000E+01 0.12011E+02 0.31100E+00 C
potential C2A 0.66000E-01 0.35000E+01 0.12011E+02 0.30700E+00 C
potential NH2 0.17000E+00 0.33000E+01 0.14007E+02 -0.12080E+01 N
potential COA 0.10500E+00 0.37500E+01 0.12011E+02 0.83400E+00 C
potential H1A 0.30000E-01 0.25000E+01 0.10080E+01 0.11000E-01 H
potential OH 0.17000E+00 0.31200E+01 0.15999E+02 -0.83800E+00 O
potential H2A 0.30000E-01 0.25000E+01 0.10080E+01 0.25000E-02 H
potential OA 0.21000E+00 0.29600E+01 0.15999E+02 -0.85400E+00 O
potential HN 0.15000E-01 0.20000E+01 0.10080E+01 0.40600E+00 H
potential HO 0.15000E-01 0.15000E+01 0.10080E+01 0.47400E+00 H
temperature 0.30000E+03
vibtemp 0.65000E+02
angtemp 0.20000E+01
dihtemp 0.00000E+00
ecoredcore 1.00000 1.00000
density 0.10000E+00

```
